# Supplementary material for: A genome catalog of the early-life human skin microbiome
Source: PubMed Central journal article supplement — bioRxiv. 2023 May 24:2023.05.22.541509. Preprint. [Version 1] doi: 10.1101/2023.05.22.541509 (PMC10312837; doi:10.1101/2023.05.22.541509), 2023-05-24
Supplement: media-1.pdf [file media-1.pdf]

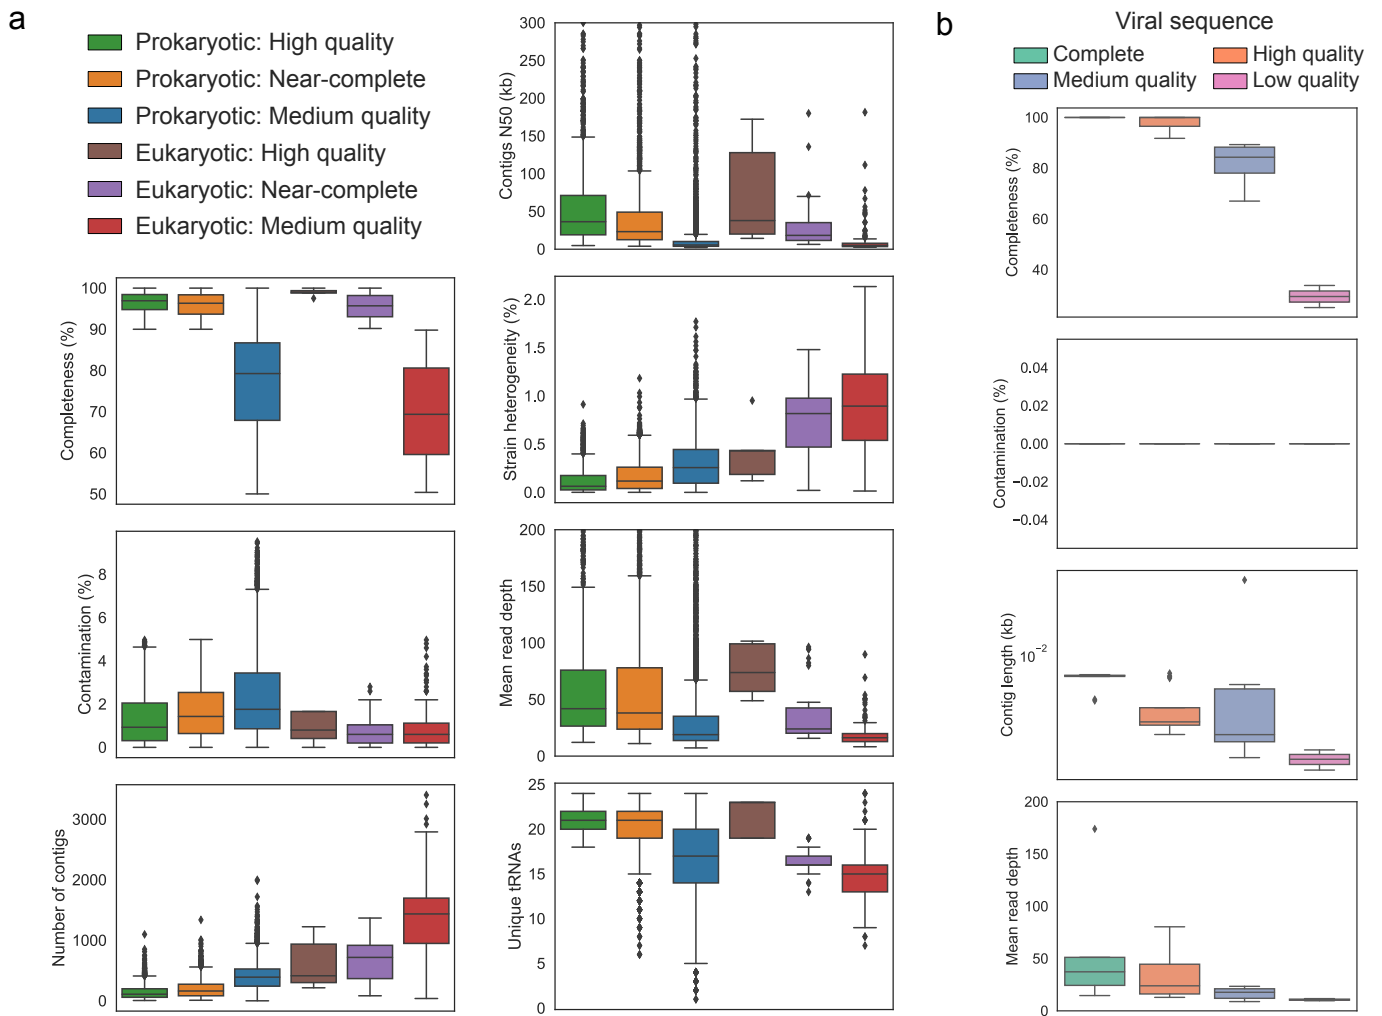

Figure S1

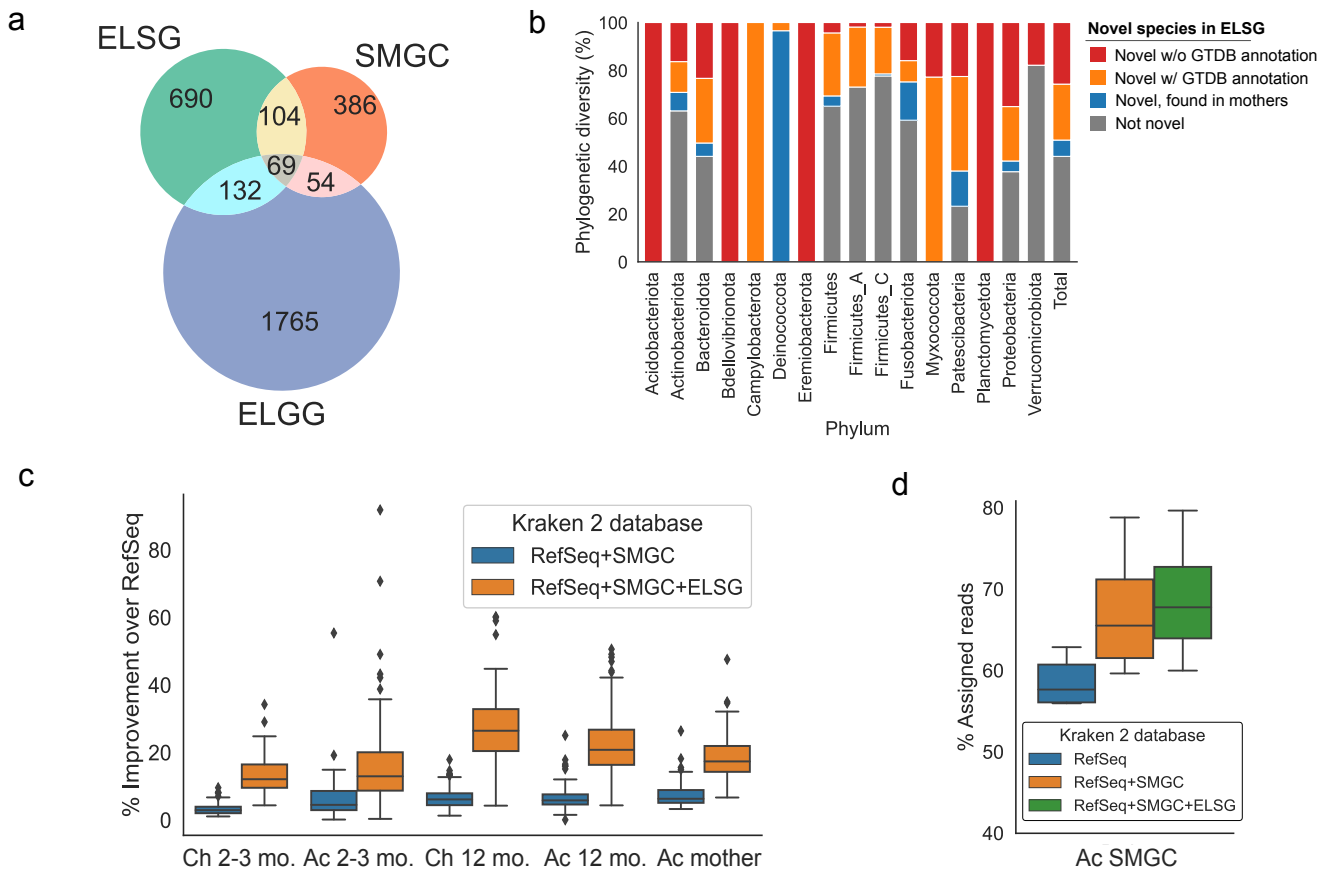

Figure S2

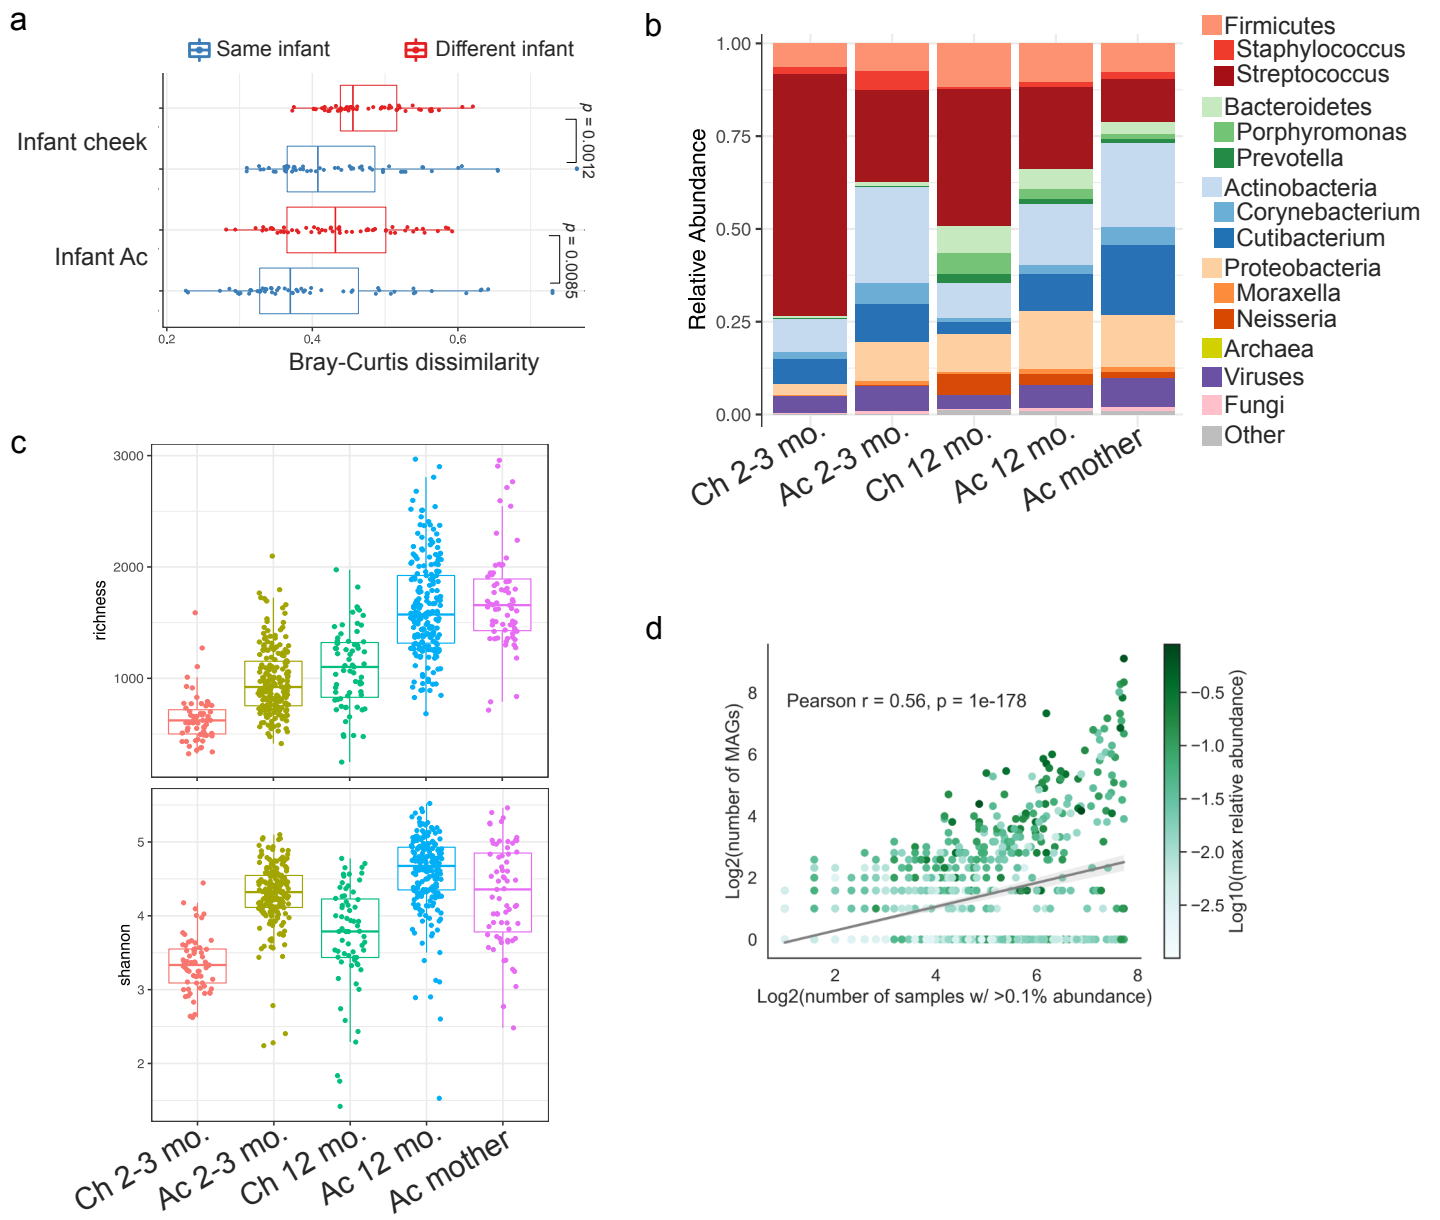

Figure S3

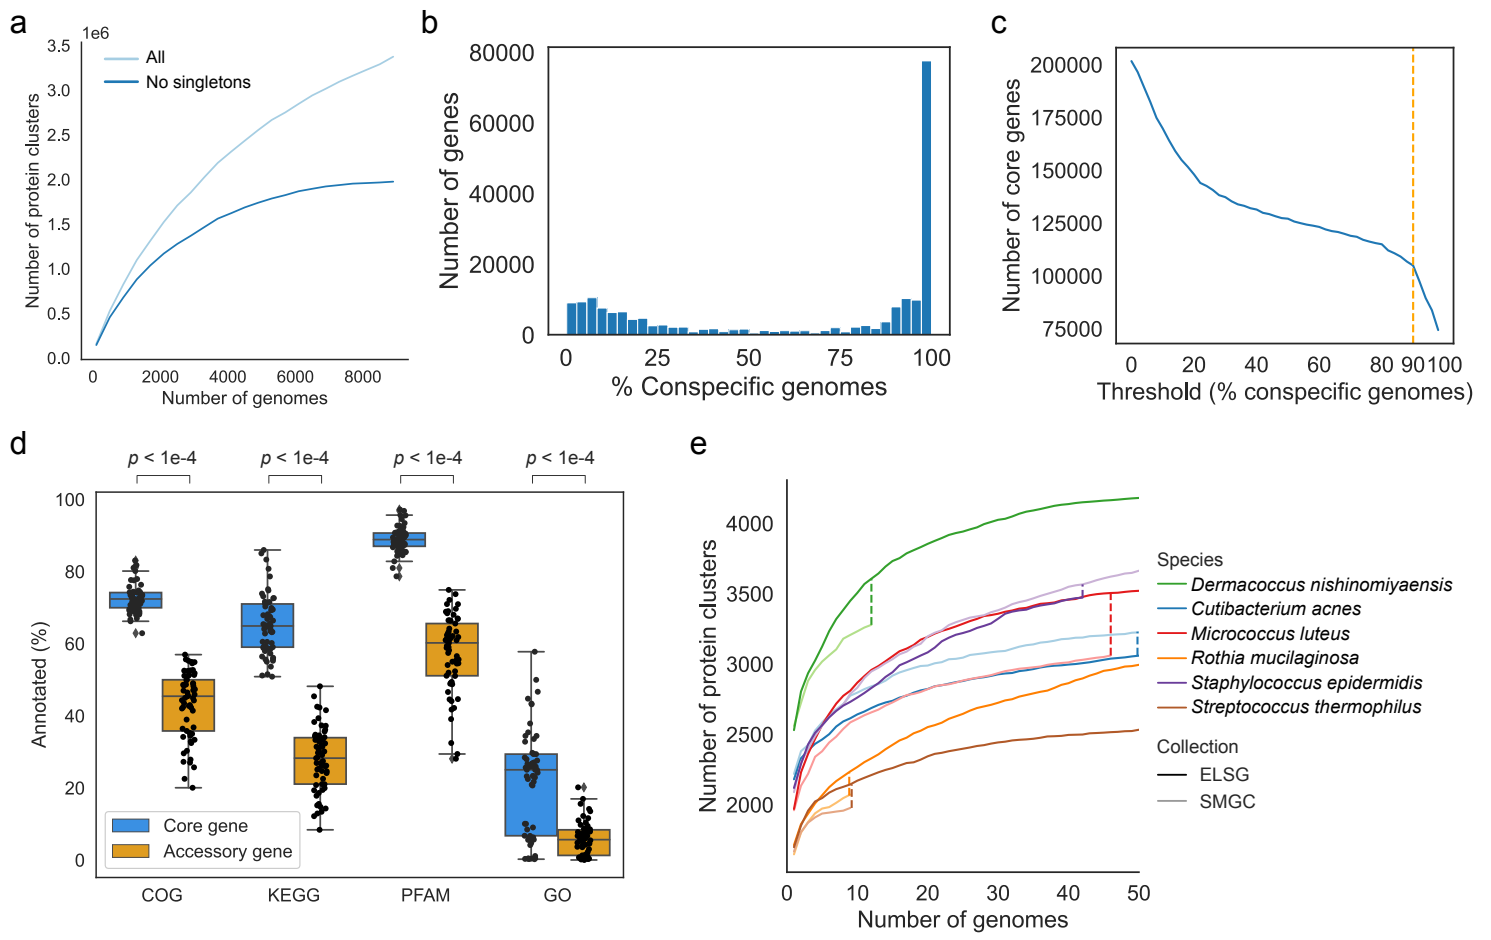

Figure S4

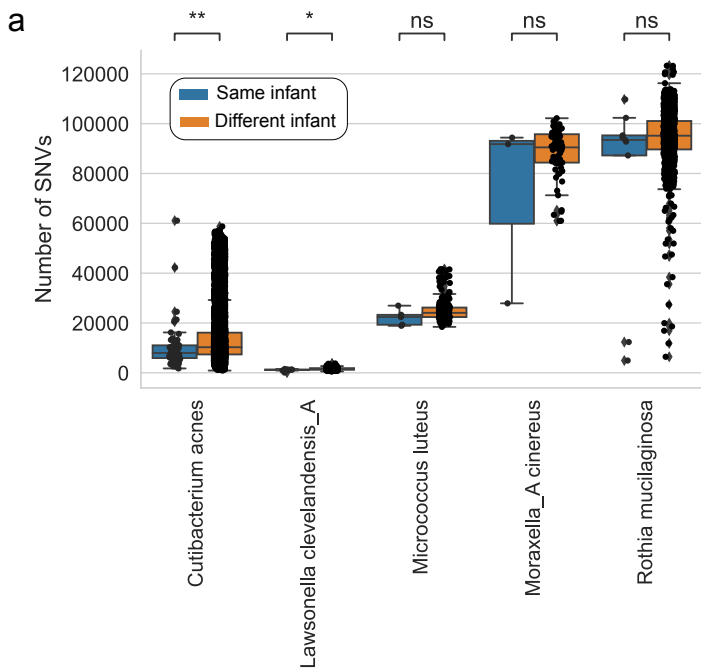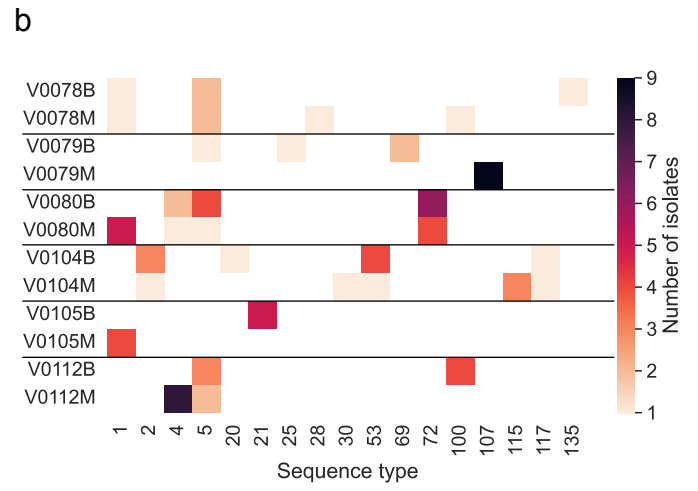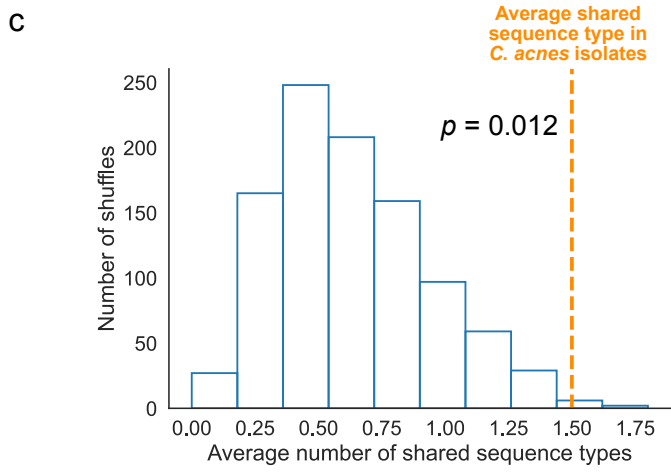

Figure S5
